# Supplementary material for: Theoretical study of substituent effects on electride characteristics and the nonlinear optical properties of Li@calix[4]pyrrole
Source: Royal Society of Chemistry journal article supplement (doi:10.1039/c9ra08758c), 2019-01-01
Supplement: c9ra08758c1.pdf [file c9ra08758c1.pdf]

**Theoretical Study of Substituent Effects on Electride Characteristics and the  
Nonlinear Optical Properties of Li@calix[4]pyrrole**

Hui Weng<sup>1</sup>, Yunyang Teng<sup>1</sup>, Qi Sheng<sup>1</sup>, Zhongjun Zhou<sup>1,2\*</sup>, Xuri Huang<sup>1</sup>, Zhiru  
Li<sup>1</sup>, Tao Zhang<sup>2</sup>

<sup>1</sup>*Institute of Theoretical Chemistry, Jilin University, Changchun, 130023,  
People's Republic of China*

<sup>2</sup>*College of Physics, Jilin University, Changchun, 130012, People's Republic of  
China*

## Computational Details

The optimized geometric structures were obtained using the B3LYP method and 6-31+G(d) basis set. In order to obtain the high-precision geometry, the self-consistent field (SCF) convergence has also been tightened to  $1 \cdot 10^{-9}$  a.u., and we used more tight optimization convergence criteria (the *verytight* option is used in Gaussian 09 package) combined with more precise integral grid (the *ultrafine* option is used in Gaussian 09 package).

**Table S1** The first hyperpolarizability ( $\beta_0$ ) of the **1** calculated by the MP2, BHandHLYP, LC-BLYP, CAM-B3LYP, wB97XD and B3LYP theory. In these calculations, the 6-311++G(3df,3pd) basis set is employed for the N atoms, alkali Li and four H atoms within NH- groups and the 6-31+g(d) basis set for other atoms.

| No. | Functional | $\beta_0$ |
|-----|------------|-----------|
| 1   | MP2        | 11853     |
| 2   | BHandHLYP  | 12705     |
| 3   | LC-BLYP    | 13424     |
| 4   | CAM-B3LYP  | 11876     |
| 5   | wB97XD     | 11300     |
| 6   | B3LYP      | 7819      |

**Table S2** The NBO charges ( $q$ , |e|)<sup>a</sup> on the N atoms and H atoms in the -NH groups of **1**, octafluorine-**1**, and octamethoxy-**1**.

| Chemical Models        | $q^{N1}$ | $q^{N2}$ | $q^{N3}$ | $q^{N4}$ | $q^{H1}$ | $q^{H2}$ | $q^{H3}$ | $q^{H4}$ |
|------------------------|----------|----------|----------|----------|----------|----------|----------|----------|
| <b>1</b>               | -0.693   | -0.693   | -0.693   | -0.693   | 0.350    | 0.350    | 0.350    | 0.350    |
|                        | (-0.755) | (-0.755) | (-0.755) | (-0.755) | (0.366)  | (0.366)  | (0.366)  | (0.366)  |
| octafluorine- <b>1</b> | -0.682   | -0.683   | -0.684   | -0.684   | 0.352    | 0.352    | 0.352    | 0.352    |
|                        | (-0.743) | (-0.743) | (-0.741) | (-0.742) | (0.368)  | (0.368)  | (0.368)  | (0.368)  |
| octamethoxy- <b>1</b>  | -0.687   | -0.690   | -0.690   | -0.686   | 0.346    | 0.334    | 0.344    | 0.354    |
|                        | (-0.742) | (-0.745) | (-0.745) | (-0.741) | (0.361)  | (0.351)  | (0.360)  | (0.368)  |

<sup>a</sup>The values outside parentheses were calculated at the CAM-B3LYP/6-31+g(d)/6-311++G(3df,3pd) level of theory. The values within parentheses were obtained at the MP2/6-31+g(d)/6-311++g(3df,3pd) level of theory.

**Table S3** The NBO charges ( $q$ , |e|)<sup>a</sup> on the N and Li<sub>out</sub> of tetra-lithium-**1**.

| Chemical Models         | $q^N$          | $q^{Li}$     |
|-------------------------|----------------|--------------|
| tetra-lithium- <b>1</b> | -0.904(-0.978) | 0.683(0.694) |

<sup>a</sup>The values outside parentheses were calculated at the CAM-B3LYP/6-31+g(d)/6-311++G(3df,3pd) level of theory. The values within parentheses were obtained at the MP2/6-31+g(d)/6-311++g(3df,3pd) level of theory.

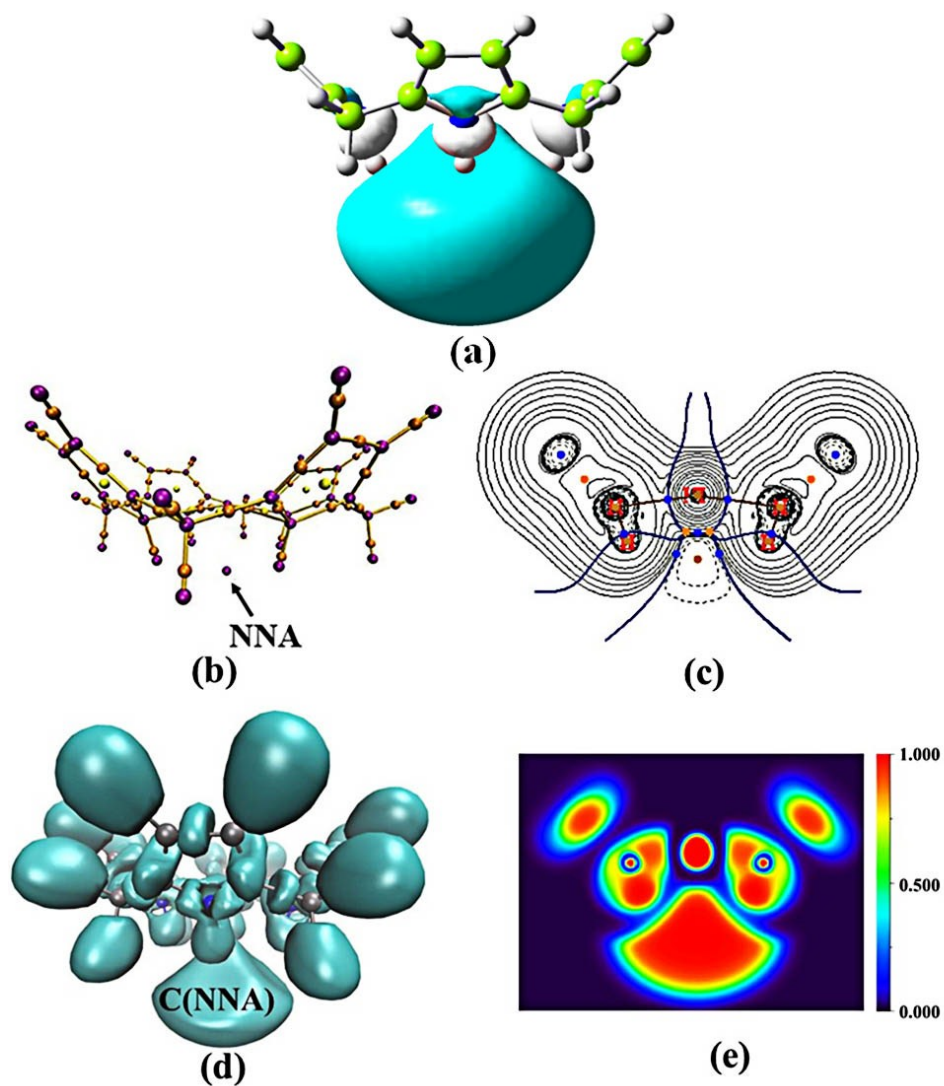

**Fig. S1.** (a) HOMO (isovalue = 0.02 au). (b) Non-nuclear attractor (NNA). (c) Two-dimensional (2D) plot of  $\nabla^2\rho(r_c)$ . (d) ELF isosurface image at a 0.800 value. (e) The colour-filled map of ELF for **1**.

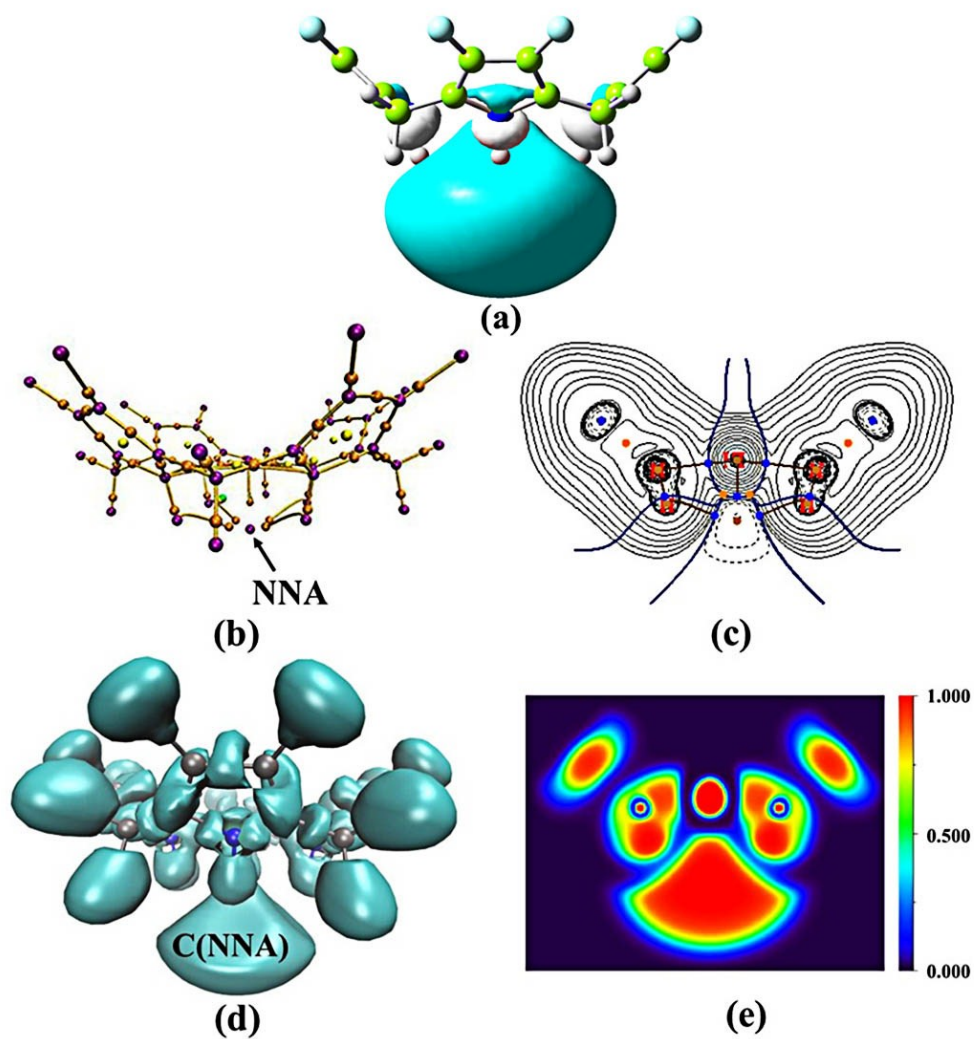

**Fig. S2.** (a) HOMO (isovalued = 0.02 au). (b) Non-nuclear attractor (NNA). (c) Two-dimensional (2D) plot of  $\nabla^2\rho(r_c)$ . (d) ELF isosurface image at a 0.800 value. (e) The colour-filled map of ELF for octafluorine-1.

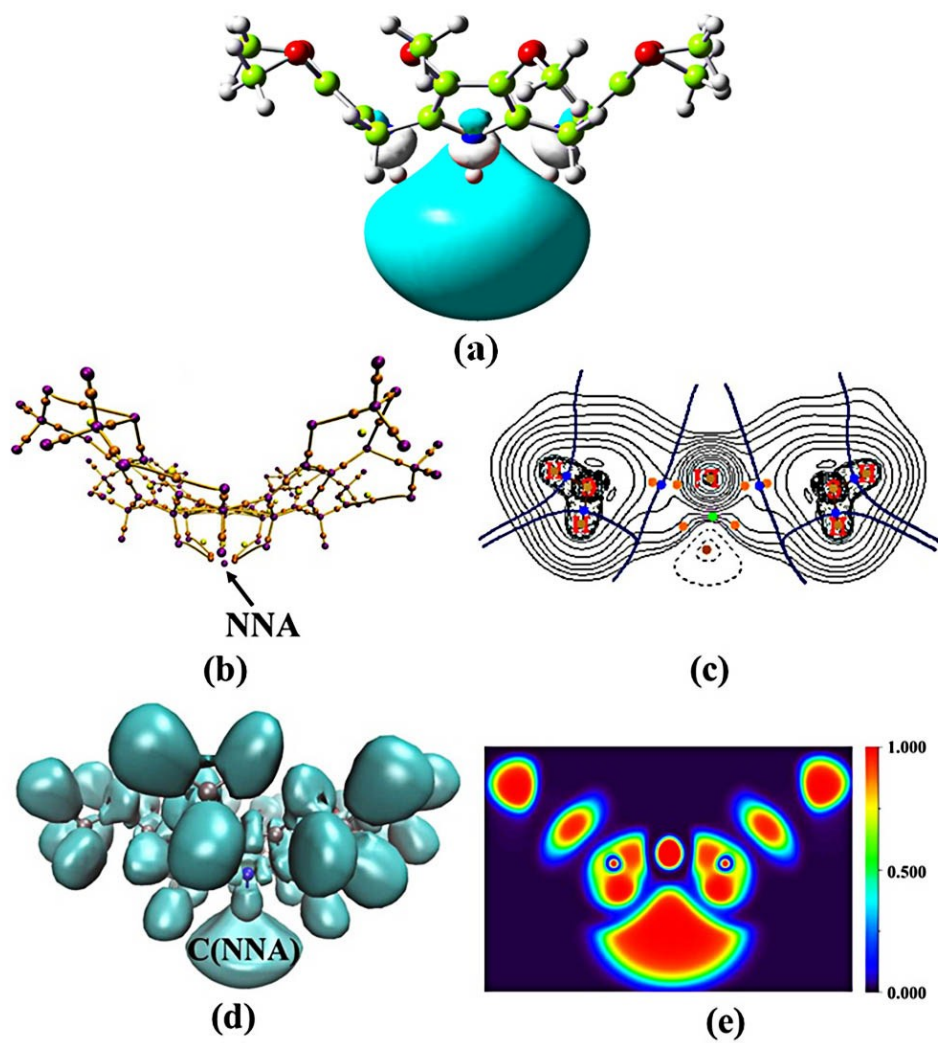

**Fig. S3.** (a) HOMO (isovalue = 0.02 au). (b) Non-nuclear attractor (NNA). (c) Two-dimensional (2D) plot of  $\nabla^2\rho(r_c)$ . (d) ELF isosurface image at a 0.800 value. (e) The colour-filled map of ELF for octamethoxy-1.

## Cartesian Coordinates of All Optimized Structures

**B3LYP/6-31+G\* scf(conver=9) opt=verytight int=ultrafine**

**1 NImag=0**

|   |           |           |           |
|---|-----------|-----------|-----------|
| 6 | 0.717553  | 3.834078  | -0.822890 |
| 6 | -0.717553 | 3.834078  | -0.822890 |
| 6 | 1.140418  | 2.923375  | 0.111064  |
| 1 | 1.363139  | 4.436225  | -1.450577 |
| 7 | 0.000000  | 2.305618  | 0.649700  |
| 6 | -1.140418 | 2.923375  | 0.111064  |
| 6 | 2.521274  | 2.521274  | 0.544203  |
| 1 | -1.363139 | 4.436225  | -1.450577 |
| 1 | 0.000000  | 1.974058  | 1.630458  |
| 6 | 2.923375  | 1.140418  | 0.111064  |
| 6 | -2.521274 | 2.521274  | 0.544203  |
| 1 | 2.608818  | 2.608818  | 1.640542  |
| 1 | 3.234572  | 3.234572  | 0.119141  |
| 6 | 3.834078  | 0.717553  | -0.822890 |
| 7 | 2.305618  | -0.000000 | 0.649700  |
| 6 | -2.923375 | 1.140418  | 0.111064  |
| 1 | -2.608818 | -2.608818 | 1.640542  |
| 1 | -3.234572 | 3.234572  | 0.119141  |
| 6 | -3.834078 | 0.717553  | -0.822890 |
| 6 | 3.834078  | -0.717553 | -0.822890 |
| 7 | -2.305618 | 0.000000  | 0.649700  |
| 6 | 2.923375  | -1.140418 | 0.111064  |
| 1 | 4.436225  | 1.363139  | -1.450577 |
| 1 | 1.974058  | -0.000000 | 1.630458  |
| 6 | -3.834078 | -0.717553 | -0.822890 |
| 1 | -1.974058 | 0.000000  | 1.630458  |
| 6 | -2.923375 | -1.140418 | 0.111064  |
| 6 | 2.521274  | -2.521274 | 0.544203  |
| 1 | -4.436225 | 1.363139  | -1.450577 |
| 1 | 4.436225  | -1.363139 | -1.450577 |
| 6 | 1.140418  | -2.923375 | 0.111064  |
| 6 | -2.521274 | -2.521274 | 0.544203  |
| 1 | -4.436225 | -1.363139 | -1.450577 |
| 1 | 2.608818  | -2.608818 | 1.640542  |
| 1 | 3.234572  | -3.234572 | 0.119141  |
| 6 | 0.717553  | -3.834078 | -0.822890 |
| 7 | -0.000000 | -2.305618 | 0.649700  |
| 6 | -1.140418 | -2.923375 | 0.111064  |

|   |           |           |           |
|---|-----------|-----------|-----------|
| 1 | -2.608818 | 2.608818  | 1.640542  |
| 1 | -3.234572 | -3.234572 | 0.119141  |
| 6 | -0.717553 | -3.834078 | -0.822890 |
| 1 | 1.363139  | -4.436225 | -1.450577 |
| 1 | -0.000000 | -1.974058 | 1.630458  |
| 1 | -1.363139 | -4.436225 | -1.450577 |
| 3 | 0.000000  | 0.000000  | 0.319735  |

octafluorine-1 **NImag=0**

|   |           |           |           |
|---|-----------|-----------|-----------|
| 6 | 0.713694  | 3.869653  | -0.356086 |
| 6 | -0.713694 | 3.869653  | -0.356086 |
| 6 | 1.150144  | 2.926391  | 0.528746  |
| 7 | 0.000000  | 2.282192  | 1.032692  |
| 6 | -1.150144 | 2.926391  | 0.528746  |
| 6 | 2.536311  | 2.536311  | 0.941488  |
| 1 | 0.000000  | 2.010609  | 2.035449  |
| 6 | 2.926391  | 1.150144  | 0.528746  |
| 6 | -2.536311 | 2.536311  | 0.941488  |
| 1 | 2.642228  | 2.642228  | 2.034621  |
| 1 | 3.240909  | 3.240909  | 0.489570  |
| 6 | 3.869653  | 0.713694  | -0.356086 |
| 7 | 2.282192  | -0.000000 | 1.032692  |
| 6 | -2.926391 | 1.150144  | 0.528746  |
| 1 | -2.642228 | -2.642228 | 2.034621  |
| 1 | -3.240909 | 3.240909  | 0.489570  |
| 6 | -3.869653 | 0.713694  | -0.356086 |
| 6 | 3.869653  | -0.713694 | -0.356086 |
| 7 | -2.282192 | 0.000000  | 1.032692  |
| 6 | 2.926391  | -1.150144 | 0.528746  |
| 1 | 2.010609  | -0.000000 | 2.035449  |
| 6 | -3.869653 | -0.713694 | -0.356086 |
| 1 | -2.010609 | 0.000000  | 2.035449  |
| 6 | -2.926391 | -1.150144 | 0.528746  |
| 6 | 2.536311  | -2.536311 | 0.941488  |
| 6 | 1.150144  | -2.926391 | 0.528746  |
| 6 | -2.536311 | -2.536311 | 0.941488  |
| 1 | 2.642228  | -2.642228 | 2.034621  |
| 1 | 3.240909  | -3.240909 | 0.489570  |
| 6 | 0.713694  | -3.869653 | -0.356086 |
| 7 | -0.000000 | -2.282192 | 1.032692  |
| 6 | -1.150144 | -2.926391 | 0.528746  |
| 1 | -2.642228 | 2.642228  | 2.034621  |



|   |           |           |           |
|---|-----------|-----------|-----------|
| 1 | -3.240909 | -3.240909 | 0.489570  |
| 6 | -0.713694 | -3.869653 | -0.356086 |
| 1 | -0.000000 | -2.010609 | 2.035449  |
| 9 | -1.482126 | -4.668233 | -1.114927 |
| 9 | 1.482126  | -4.668233 | -1.114927 |
| 9 | 4.668233  | -1.482126 | -1.114927 |
| 9 | 4.668233  | 1.482126  | -1.114927 |
| 9 | 1.482126  | 4.668233  | -1.114927 |
| 9 | -1.482126 | 4.668233  | -1.114927 |
| 9 | -4.668233 | 1.482126  | -1.114927 |
| 9 | -4.668233 | -1.482126 | -1.114927 |
| 3 | 0.000000  | 0.000000  | 0.745805  |

octamethoxy-1 **NImag=0**

|   |           |           |           |
|---|-----------|-----------|-----------|
| 6 | 3.221205  | 2.214672  | -0.175688 |
| 6 | 2.184634  | 3.224610  | -0.177221 |
| 6 | 2.854056  | 1.235875  | 0.715369  |
| 7 | 1.588645  | 1.572947  | 1.225899  |
| 6 | 1.225227  | 2.838508  | 0.723488  |
| 6 | 3.562375  | -0.023521 | 1.115309  |
| 1 | 1.392758  | 1.370166  | 2.224457  |
| 6 | 2.859356  | -1.288827 | 0.724949  |
| 6 | -0.029517 | 3.540513  | 1.140429  |
| 1 | 3.746521  | -0.018430 | 2.205160  |
| 1 | 4.540022  | -0.023366 | 0.626571  |
| 6 | 3.228293  | -2.271943 | -0.159347 |
| 7 | 1.594852  | -1.627760 | 1.239443  |
| 6 | -1.298712 | 2.851379  | 0.737816  |
| 1 | -3.760762 | -0.024604 | 2.262553  |
| 1 | -0.009875 | 4.531549  | 0.679377  |
| 6 | -2.277526 | 3.218984  | -0.152216 |
| 6 | 2.195407  | -3.286917 | -0.152714 |
| 7 | -1.638684 | 1.585538  | 1.249463  |
| 6 | 1.235766  | -2.900129 | 0.746666  |
| 1 | 1.405402  | -1.423642 | 2.237542  |
| 6 | -3.291403 | 2.185067  | -0.149255 |
| 1 | -1.436728 | 1.395155  | 2.247370  |
| 6 | -2.907409 | 1.224949  | 0.750695  |
| 6 | -0.023180 | -3.591288 | 1.170193  |
| 6 | -1.288381 | -2.904237 | 0.759326  |
| 6 | -3.609542 | -0.029804 | 1.167944  |
| 1 | -0.017059 | -3.726362 | 2.266776  |

|   |           |           |           |
|---|-----------|-----------|-----------|
| 1 | -0.023472 | -4.589472 | 0.723023  |
| 6 | -2.253810 | -3.288334 | -0.133965 |
| 7 | -1.648941 | -1.635658 | 1.262614  |
| 6 | -2.921023 | -1.298231 | 0.761014  |
| 1 | -0.022762 | 3.692467  | 2.235004  |
| 1 | -4.601377 | -0.009319 | 0.708618  |
| 6 | -3.291066 | -2.276632 | -0.127335 |
| 1 | -1.456070 | -1.442775 | 2.260554  |
| 3 | -0.038589 | -0.037688 | 0.866260  |
| 8 | -2.132269 | -4.382874 | -0.940306 |
| 8 | -4.398099 | -2.273154 | -0.940858 |
| 8 | -4.391069 | 2.056665  | -0.948356 |
| 8 | -2.270188 | 4.321065  | -0.972700 |
| 8 | 2.048750  | 4.321279  | -0.979545 |
| 8 | 4.330773  | 2.203585  | -0.987289 |
| 8 | 2.066172  | -4.385073 | -0.953149 |
| 8 | 4.336410  | -2.263444 | -0.972811 |
| 6 | -5.631131 | -2.626125 | -0.307412 |
| 1 | -6.398062 | -2.576829 | -1.084254 |
| 1 | -5.587665 | -3.643141 | 0.104753  |
| 1 | -5.883884 | -1.926147 | 0.498208  |
| 6 | -3.284395 | -5.213029 | -1.094798 |
| 1 | -3.668419 | -5.532749 | -0.116097 |
| 1 | -4.071317 | -4.699866 | -1.656089 |
| 1 | -2.947246 | -6.088170 | -1.654990 |
| 6 | -5.196871 | 3.219308  | -1.148626 |
| 1 | -4.665869 | 3.973497  | -1.737134 |
| 1 | -6.077490 | 2.879256  | -1.698352 |
| 1 | -5.510642 | 3.646408  | -0.186017 |
| 6 | -2.622027 | 5.558848  | -0.347677 |
| 1 | -2.564417 | 6.321665  | -1.127987 |
| 1 | -3.641874 | 5.521724  | 0.058079  |
| 1 | -1.926253 | 5.812462  | 0.461245  |
| 6 | 3.206908  | 5.128678  | -1.195157 |
| 1 | 3.956897  | 4.596901  | -1.788559 |
| 1 | 2.859382  | 6.005324  | -1.746553 |
| 1 | 3.642449  | 5.449362  | -0.238614 |
| 6 | 5.554072  | 2.603046  | -0.362130 |
| 1 | 6.328133  | 2.528207  | -1.129904 |
| 1 | 5.494793  | 3.637096  | 0.002219  |
| 1 | 5.808231  | 1.945469  | 0.478474  |
| 6 | 3.217094  | -5.212257 | -1.126086 |
| 1 | 2.871954  | -6.090514 | -1.676435 |
| 1 | 3.991778  | -4.699721 | -1.705015 |

|   |          |           |           |
|---|----------|-----------|-----------|
| 1 | 3.620779 | -5.527552 | -0.153860 |
| 6 | 5.561343 | -2.655908 | -0.346677 |
| 1 | 5.502972 | -3.685470 | 0.030181  |
| 1 | 6.333162 | -2.590495 | -1.117586 |
| 1 | 5.818362 | -1.988411 | 0.485311  |

tetra-lithium-1 NImag=0

|   |           |           |           |
|---|-----------|-----------|-----------|
| 6 | -0.710382 | 4.002281  | 0.763069  |
| 6 | 0.710382  | 4.002281  | 0.763069  |
| 6 | -1.110112 | 2.923644  | -0.000799 |
| 1 | -1.367305 | 4.703107  | 1.264785  |
| 7 | 0.000000  | 2.218906  | -0.485424 |
| 6 | 1.110112  | 2.923644  | -0.000799 |
| 6 | -2.524701 | 2.524701  | -0.349024 |
| 1 | 1.367305  | 4.703107  | 1.264785  |
| 6 | -2.923644 | 1.110112  | -0.000799 |
| 6 | 2.524701  | 2.524701  | -0.349024 |
| 1 | -2.738750 | 2.738750  | -1.424762 |
| 1 | -3.203174 | 3.203174  | 0.174538  |
| 6 | -4.002281 | 0.710382  | 0.763069  |
| 7 | -2.218906 | 0.000000  | -0.485424 |
| 6 | 2.923644  | 1.110112  | -0.000799 |
| 1 | 2.738750  | -2.738750 | -1.424762 |
| 1 | 3.203174  | 3.203174  | 0.174538  |
| 6 | 4.002281  | 0.710382  | 0.763069  |
| 6 | -4.002281 | -0.710382 | 0.763069  |
| 7 | 2.218906  | -0.000000 | -0.485424 |
| 6 | -2.923644 | -1.110112 | -0.000799 |
| 1 | -4.703107 | 1.367305  | 1.264785  |
| 6 | 4.002281  | -0.710382 | 0.763069  |
| 6 | 2.923644  | -1.110112 | -0.000799 |
| 6 | -2.524701 | -2.524701 | -0.349024 |
| 1 | 4.703107  | 1.367305  | 1.264785  |
| 1 | -4.703107 | -1.367305 | 1.264785  |
| 6 | -1.110112 | -2.923644 | -0.000799 |
| 6 | 2.524701  | -2.524701 | -0.349024 |
| 1 | 4.703107  | -1.367305 | 1.264785  |
| 1 | -2.738750 | -2.738750 | -1.424762 |
| 1 | -3.203174 | -3.203174 | 0.174538  |
| 6 | -0.710382 | -4.002281 | 0.763069  |
| 7 | -0.000000 | -2.218906 | -0.485424 |

|   |           |           |           |
|---|-----------|-----------|-----------|
| 6 | 1.110112  | -2.923644 | -0.000799 |
| 1 | 2.738750  | 2.738750  | -1.424762 |
| 1 | 3.203174  | -3.203174 | 0.174538  |
| 6 | 0.710382  | -4.002281 | 0.763069  |
| 1 | -1.367305 | -4.703107 | 1.264785  |
| 1 | 1.367305  | -4.703107 | 1.264785  |
| 3 | 0.000000  | 0.000000  | 0.290054  |
| 3 | -1.281242 | 1.281242  | -1.717338 |
| 3 | 1.281242  | 1.281242  | -1.717338 |
| 3 | 1.281242  | -1.281242 | -1.717338 |
| 3 | -1.281242 | -1.281242 | -1.717338 |
